# Supplementary material for: Acetylacetone functionalized periodic mesoporous organosilicas: from sensing to catalysis
Source: Royal Society of Chemistry journal article supplement (doi:10.1039/d4ta01143k), 2024-01-01
Supplement: d4ta01143k1.pdf [file d4ta01143k1.pdf]

## Supporting Information

### Acetylacetonate Functionalized Periodic Mesoporous Organosilicas: from Sensing to Catalysis

---

Chunhui Liu<sup>a,b,c</sup>, Mahdieh Haghighat<sup>a</sup>, Himanshu Sekhar Jena<sup>a</sup>, Dirk Poelman<sup>b</sup>, Nathalie De Geyter<sup>d</sup>, Rino Morent<sup>d</sup>, Anna M. Kaczmarek<sup>c\*</sup>, and Pascal Van Der Voort<sup>a\*</sup>

<sup>a</sup>COMOC - Center for Ordered Materials Organometallics and Catalysis, Department of Chemistry, Ghent University, Krijgslaan 281 S3, 9000 Ghent;

<sup>b</sup>Lumilab, Department of Solid State Sciences, Ghent University, Krijgslaan 281 S1, 9000 Ghent;

<sup>c</sup>NanoSensing Group, Department of Chemistry, Ghent University, Krijgslaan 281 S3, 9000 Ghent

<sup>d</sup>RUPT - Research Unit Plasma Technology, Department of Applied Physics, Ghent University, St-Pietersnieuwstraat 41 B4, 9000 Ghent

\* Corresponding authors: Email: Anna.Kaczmarek@UGent.be; Email: Pascal.VanDerVoort@UGent.be

**Table S 1** The comparisons of the sensing performance for different nanoparticle fluorometric sensors in aqueous solution.

| Fluorescence probe                               | Materials                                         | Analytes detected                   | Linear range        | $K_{sv}$ ( $M^{-1}$ ) | LOD                        | Ref       |
|--------------------------------------------------|---------------------------------------------------|-------------------------------------|---------------------|-----------------------|----------------------------|-----------|
| NS-CQDs                                          | carbon quantum dots (CQDs)                        | $Cu^{2+}$                           | 0 – 1 $\mu M$       | -                     | 1.65 $\mu M$               | 1         |
| $SiO_2/CdS$ NCs                                  | nanocrystals                                      | $Cu^{2+}$                           | 0 – 3 $\mu M$       | -                     | $3.5 \times 10^{-2} \mu M$ | 2         |
| ZCM microsphere                                  | QD composite                                      | $Cu^{2+}$ , $Cr^{2+}$ , $Fe^{3+}$   | 0 – 1 $\mu M$       | $3.85 \times 10^5$    | $1.6 \times 10^{-5} \mu M$ | 3         |
| CE/11-MUA-AuNCs                                  | gold nanoclusters                                 | $Cu^{2+}$ , $Cd^{2+}$ , $Zn^{2+}$   | 0.05–10 $\mu M$     | -                     | 0.026 $\mu M$              | 4         |
| AlEgens fabricated on nanoscale ZIF-8            | aggregation-induced emission luminogens with MOFs | $Cu^{2+}$                           | 0 – 0.1 $\mu M$     | -                     | $5.5 \times 10^{-4} \mu M$ | 5         |
| $[Ce(1,5-NDS)_{1.5}(H_2O)_5]_n$                  | MOFs                                              | $Cu^{2+}$                           | 5 - 100 $\mu M$     | 7668                  | 3 $\mu M$                  | 6         |
| AuNCs/PQD@ $SiO_2$                               | gold nanocomposites                               | $Cu^{2+}$                           | 0 - 160 $\mu M$     | 4400                  | 3 $\mu M$                  | 7         |
| QG-scaffolded COFs                               | COFs                                              | $Cu^{2+}$                           | 0.0032 - 32 $\mu M$ | -                     | $5 \times 10^{-4} \mu M$   | 8         |
| $[Eu(bpdc)_{1.5}(H_2O)_2]_n$                     | Eu-MOFs                                           | $Fe^{3+}$ , $Cu^{2+}$ , $PO_4^{3-}$ | 0 – 400 $\mu M$     | 3240                  | 33 $\mu M$                 | 9         |
| $\{[Eu(L)(DMF)(H_2O)] \cdot 0.5DMF\}_n$          | Eu-MOFs                                           | $Cu^{2+}$                           | 0.01 - 1000 $\mu M$ | $4.3 \times 10^4$     | $1.02 \times 10^3 \mu M$   | 10        |
| $[Eu(L)(DEF)(H_2O)]_n$                           | Eu-MOFs                                           | $Cu^{2+}$                           | 0.01 - 1000 $\mu M$ | $5.7 \times 10^4$     | $5 \times 10^4 \mu M$      | 11        |
| Eu-MOFs (4, 40-AZ, DMF and $H_3BTC$ )            | Eu-MOFs                                           | $Cu^{2+}$                           | 2 - 1000 $\mu M$    | $2.9 \times 10^4$     | 1.395 $\mu M$              | 11        |
| $\{[Tb(HL)] \cdot 3DMF \cdot 3H_2O\}_n$ (LZG-Tb) | Tb-MOFs                                           | $Cu^{2+}$                           | 0 - 0.25 $\mu M$    | $8.2 \times 10^6$     | $1.65 \times 10^3 \mu M$   | 12        |
| $\{[Eu(HL)] \cdot 3DMF \cdot 3H_2O\}_n$ (LZG-Eu) | Eu-MOFs                                           | $Cu^{2+}$                           | 0 - 0.25 $\mu M$    | $4.9 \times 10^6$     | $1.35 \times 10^3 \mu M$   | 12        |
| TH-PMO-100                                       | PMOs                                              | $Cu^{2+}$                           | 0.1 - 1 $\mu M$     | $1.6 \times 10^4$     | 40 $\mu M$                 | 13        |
| RSPMOs                                           | PMOs                                              | $Cu^{2+}$                           | 0.1 - 1 $\mu M$     | -                     | 0.1 $\mu M$                | 14        |
| SCN-PMO                                          | PMOs                                              | $Cu^{2+}$                           | 8.75 - 20 $\mu M$   | -                     | 0.67 $\mu M$               | 15        |
| Ag-PMO-YS                                        | nanocomposites                                    | $Cu^{2+}$                           | 0.1 - 9 $\mu M$     | -                     | 0.02 $\mu M$               | 16        |
| $Eu(NTA)_3L-COOH-PMO$                            | Eu-PMOs                                           | $Cu^{2+}$                           | 0 - 20 $\mu M$      | $2.5 \times 10^6$     | 0.046 $\mu M$              | 17        |
| ePMO@Eu_PA                                       | Eu-PMOs                                           | $Cu^{2+}$                           | 0 - 400 $\mu M$     | 2100                  | 35.2 $\mu M$               | 18        |
| acac(20)-PMO@Eu_tta                              | Eu-PMOs                                           | $Cu^{2+}$                           | 0 - 2.5 $\mu M$     | $1.8 \times 10^5$     | 0.108 $\mu M$              | This work |

**Table S 2** Comparison of the acac-PMO catalyst with other VO(acac)<sub>2</sub> based catalysts.

| Entry | Catalyst              | Reaction conditions                               | Yield (%) | TON <sup>a</sup> | Ref       |
|-------|-----------------------|---------------------------------------------------|-----------|------------------|-----------|
| 1     | VO(acac) <sub>2</sub> | catalyst (10 mol %), $CH_2Cl_2$ , reflux, 8 h     | 92        | 9.2              | 19        |
| 2     | VO-TAPT-2,3-DHTA COF  | catalyst (35 mg, 0.97 mmol/g V), DCM, 40 °C, 12 h | 98        | 29               | 20        |
| 3     | VO-PyTTA-2,3-DHTA COF | catalyst (35 mg, 0.77 mmol/g V), DCM, 40 °C, 12 h | 96        | 36               | 20        |
| 3     | V@acac-CTF            | catalyst (40 mg, 0.306 mmol/g V), DCM, 40 °C, 8 h | 95        | 213              | 21        |
| 4     | acac(100)-PMO@VO_acac | catalyst (15 mg, 0.59 mmol/g V), DCM, 40 °C, 12 h | 98        | 111              | This work |

<sup>a</sup> TON = turnover number

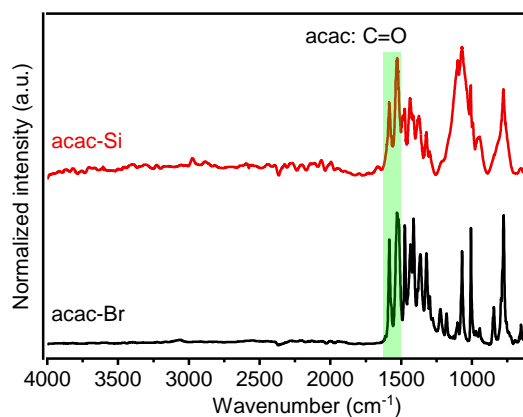

**Figure S1.** FT-IR spectra of acac-Br and acac-Si.

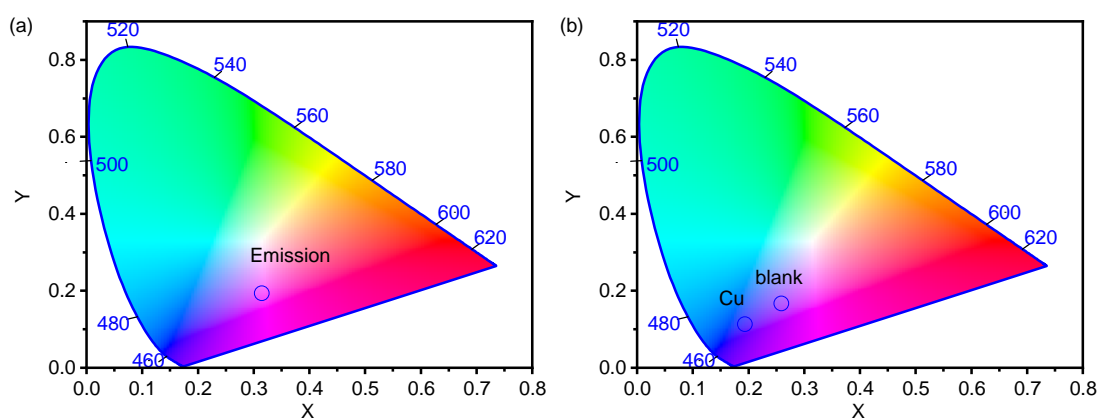

**Figure S2.** CIE chromaticity diagram of (a) solid acac(20)-PMO@Eu\_tta; (b) colloidal suspensions of acac(20)-PMO@Eu\_tta with and without Cu<sup>2+</sup>.

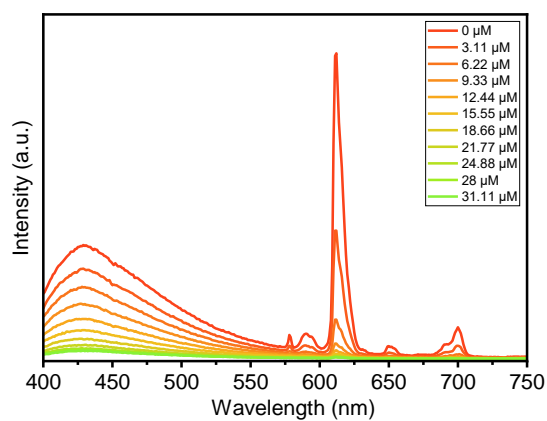

**Figure S3.** Luminescence spectra of acac(20)-PMO@Eu\_tta under different concentrations of Cu<sup>2+</sup> aqueous solutions.

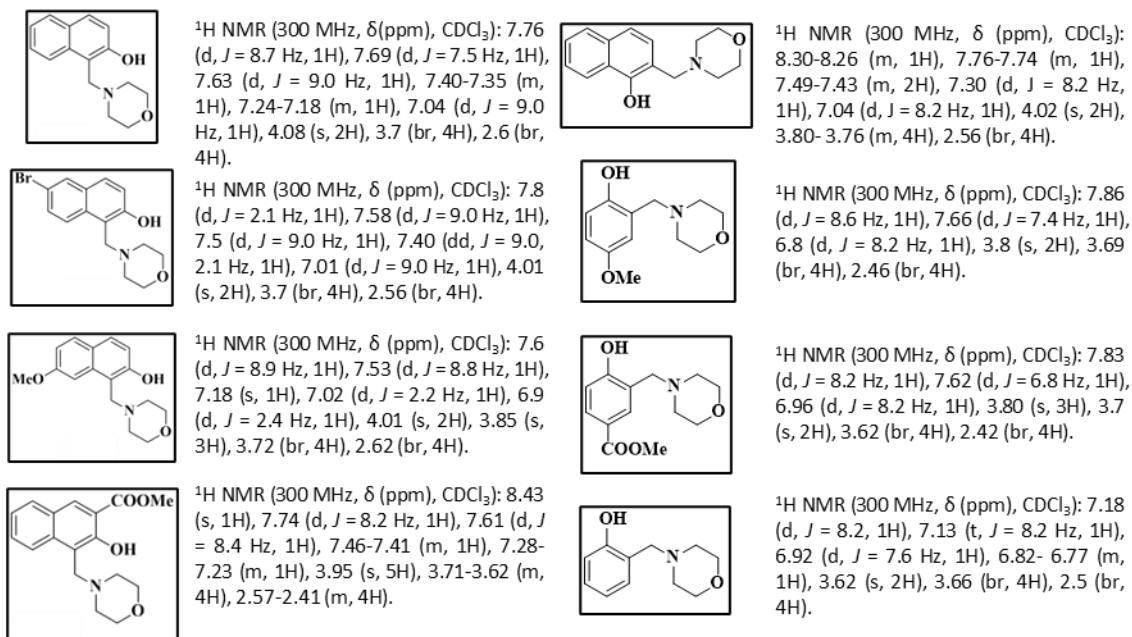

**Figure S4.**  $^1\text{H-NMR}$  data of Mannich-reaction product in  $\text{CDCl}_3$ .

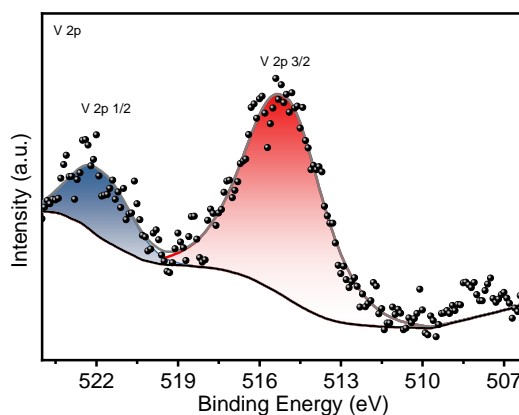

**Figure S5.** Deconvoluted XPS spectra of vanadium in the V 2p region for acac(100)-PMO@VO\_acac catalyst.

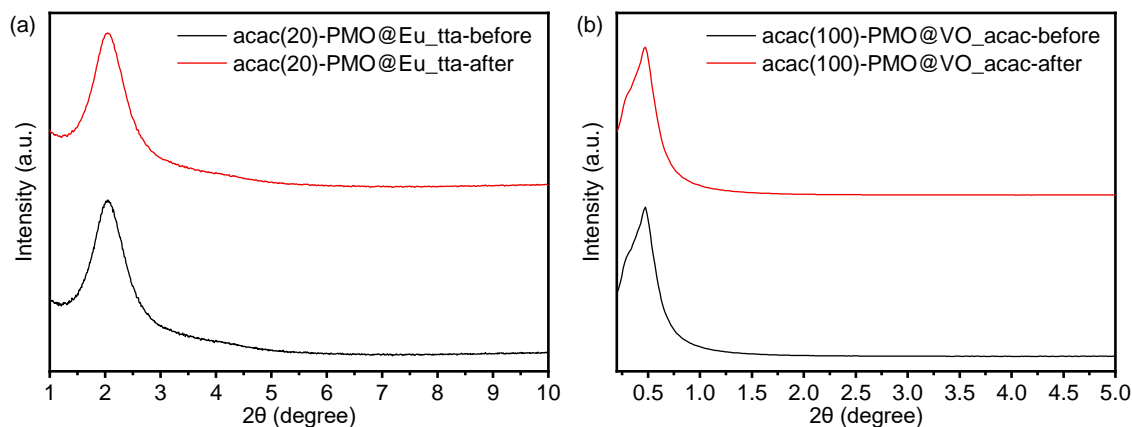

**Figure S6.** (a) XRD patterns of acac(20)-PMO@Eu\_tta before and after immersing in water with  $\text{Cu}^{2+}$  ions and (b) XRD patterns of acac(100)-PMO@VO\_acac before and after catalysis.

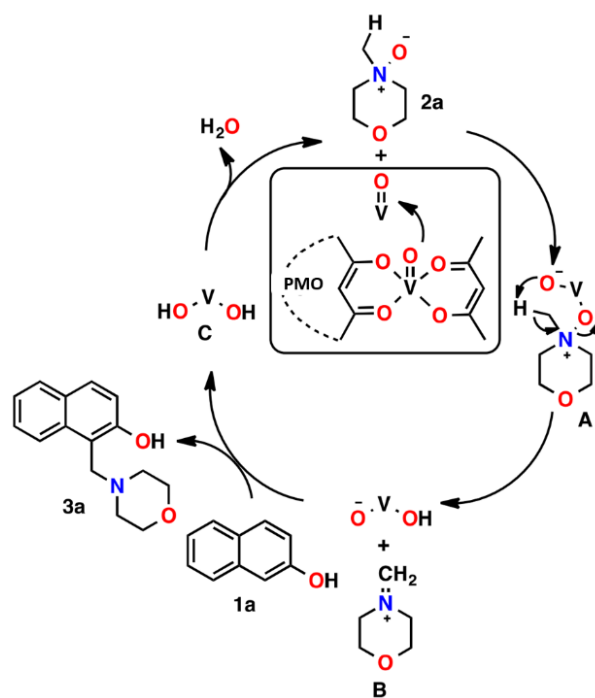

**Scheme S 1** Proposed mechanism of Mannich-type reaction catalyzed by acac(100)-PMO@VO<sub>2</sub>.

## References

1. N. Chaudhary, P. K. Gupta, S. Eremin and P. R. Solanki, *J. Environ. Chem. Eng.*, 2020, 8, 103720.
2. T. Xie, X. Zhong, Z. Liu and C. Xie, *Mikrochim. Acta*, 2020, 187, 323.
3. M. M. R. Khan, T. Mitra and D. Sahoo, *RSC Adv*, 2020, 10, 9512-9524.
4. M. L. Desai, H. Basu, S. Saha, R. K. Singhal and S. K. Kailasa, *J. Mol. Liq.*, 2020, 304, 112697.
5. S. Xie, Q. Liu, F. Zhu, M. Chen, L. Wang, Y. Xiong, Y. Zhu, Y. Zheng and X. Chen, *J Mater Chem C*, 2020, 8, 10408-10415.
6. S. Geranmayeh, M. Mohammadnejad and S. Mohammadi, *Ultrason Sonochem*, 2018, 40, 453-459.
7. W. Xue, J. Zhong, H. Wu, J. Zhang and Y. Chi, *Analyst*, 2021, 146, 7545-7553.
8. Y. Y. Cai, Y. Jiang, L. P. Feng, Y. Hua, H. Liu, C. Fan, M. Y. Yin, S. Li, X. X. Lv and H. Wang, *Anal. Chim. Acta*, 2019, 1057, 88-97.
9. Z. D. Li, Z. Y. Zhan, Y. J. Jia, Z. Li and M. Hu, *J Ind Eng Chem*, 2021, 97, 180-187.
10. R. R. Ma, Z. W. Chen, S. N. Wang, Q. X. Yao, Y. W. Li, J. Lu, D. C. Li and J. M. Dou, *J Solid State Chem*, 2017, 252, 142-151.
11. J. C. Zhou, Y. H. Chen, S. Xian, Y. C. Liang, G. J. Huang, L. Wang and X. Z. Yang, *J Solid State Chem*, 2021, 304, 122542.
12. Z. G. Lin, F. Q. Song, H. Wang, X. Q. Song, X. X. Yu and W. S. Liu, *Dalton Trans.*, 2021, 50, 1874-1886.
13. M. Gao, S. Han, Y. Hu and L. Zhang, *J. Phys. Chem. C*, 2016, 120, 9299-9307.
14. X. Y. Qiu, S. H. Han and M. Gao, *J. Mater. Chem. A*, 2013, 1, 1319-1325.
15. M. Gao, C. Xing, X. Jiang, L. Xu, P. Li and C. D. Hsiao, *J. Lumin.*, 2021, 36, 951-957.
16. L. Yang, S. Shen, J. Zhu, Y. Zhang, Y. Lin, J. Wang, F. Tao, L. Wang and J. Zhang, *ACS Appl. Nano Mater.*, 2023, 6, 1910-1918.
17. H. Li, Y. J. Li, Z. Zhang, X. L. Pang and X. D. Yu, *Mater Design*, 2019, 172, 107712.
18. W. Liu, A. M. Kaczmarek, H. Rijckaert, P. Van Der Voort and R. Van Deun, *Dalton Trans*, 2021, 50, 11061-11070.

19. D. R. Hwang and B. J. Uang, *Org. Lett.*, 2002, 4, 463-466.
20. H. Vardhan, L. X. Hou, E. Yee, A. Nafady, M. A. Al-Abdrabalnabi, A. M. Al-Enizi, Y. X. Pan, Z. Y. Yang and S. Q. Ma, *Acs Sustain Chem Eng*, 2019, 7, 4878-4888.
21. H. S. Jena, C. Krishnaraj, G. B. Wang, K. Leus, J. Schmidt, N. Chaoui and P. Van der Voort, *Chem. Mater.*, 2018, 30, 4102-4111.
